# Supplementary material for: The Global Long-term Microwave Vegetation Optical Depth Climate Archive VODCA
Source: Copernicus journal article supplement (doi:10.5194/essd-2019-42), 2019-04-15
Supplement: Supplementary file 1 [file essd-2019-42-supplement.pdf]

## 1 Supplementary figures

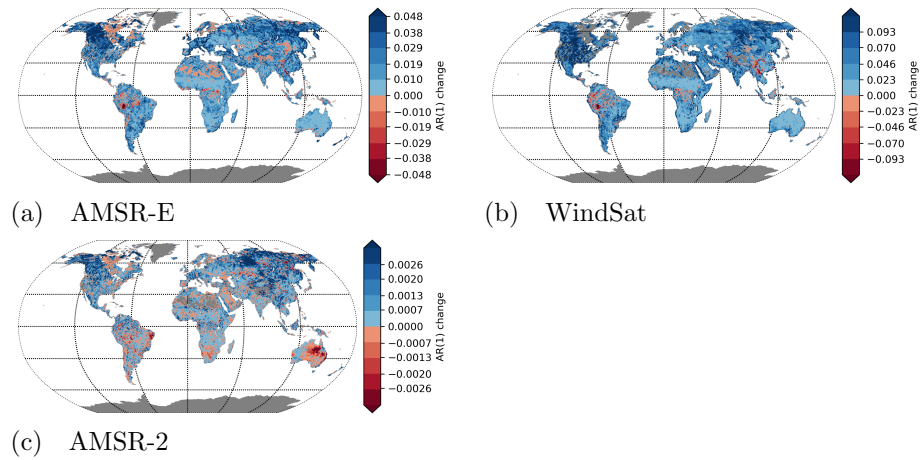

**Figure 1.** First-order auto-correlation change due to merging of C-band data for each sensor

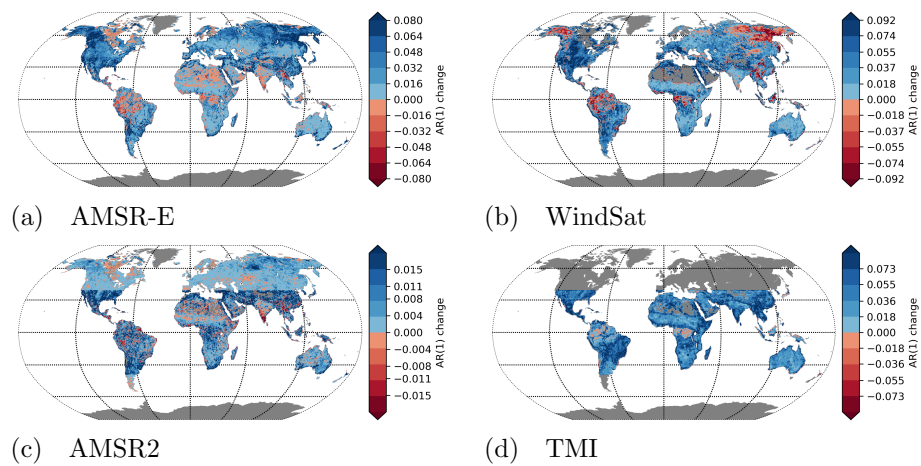

**Figure 2.** First-order auto-correlation change due to merging of X-band data for each sensor

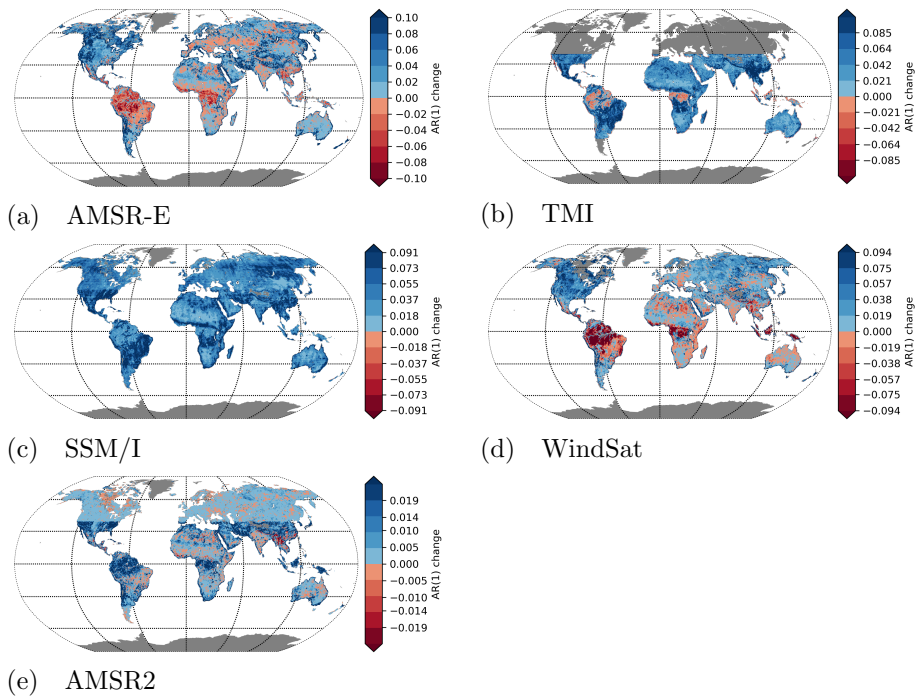

**Figure 3.** First-order auto-correlation change due to merging of Ku-band data for each sensor

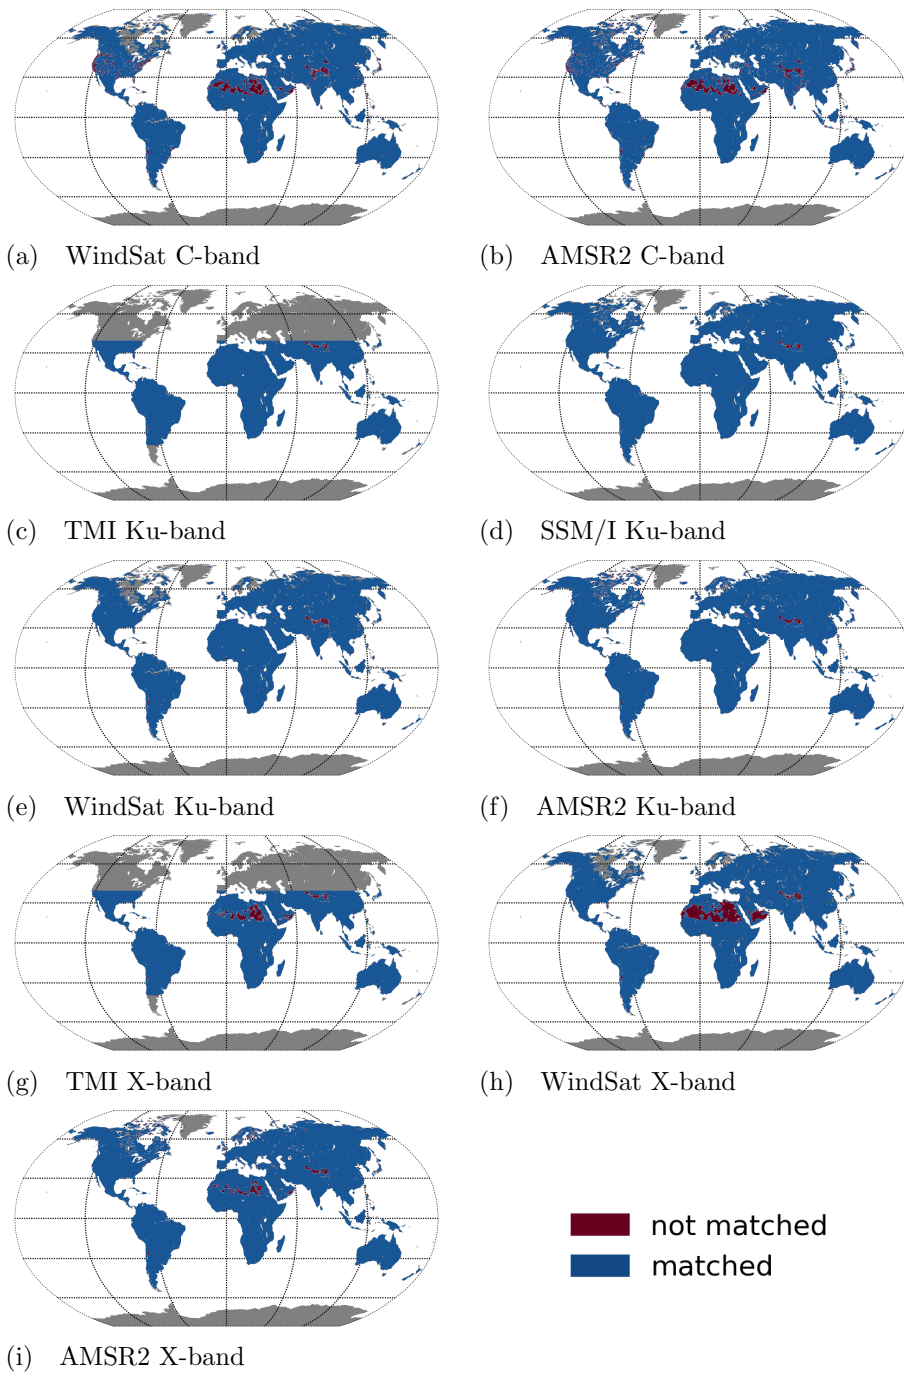

**Figure 4.** Data loss due to failed CDF matching for each band/sensor combination
